# Supplementary material for: Outcome of Newborns with Confirmed or Possible SARS-CoV-2 Vertical Infection—A Scoping Review
Source: MDPI journal article supplement (doi:10.3390/diagnostics13020245), 2023-01-09
Supplement: s1 [file s1]

## Quality Assessment and Summary of Key Characteristics of Included Studies

**Table S1.** Case Reports/Case Series Studies assessed using the Murad Tool Scoring Criteria [1]. The study is classified as "good quality" – score 4, "fair quality" – score 3 and "poor quality" score between 1-2

| Author                        | Country     | Number of eligible newborns | Quality Assessment Score |
|-------------------------------|-------------|-----------------------------|--------------------------|
| Abadía-Cuchí <i>et al</i> [2] | Spain       | 1                           | 2                        |
| Alzamora MC <i>et al</i> [3]  | Peru        | 1                           | 4                        |
| Babal <i>et al</i> [4]        | Slovakia    | 1                           | 2                        |
| Boncompagni <i>et al</i> [5]  | Italy       | 1                           | 3                        |
| Buonsenso D <i>et al</i> [6]  | Italy       | 1                           | 3                        |
| Carvalho <i>et al</i> [7]     | Brazil      | 2                           | 4                        |
| Choobdar <i>et al</i> [8]     | Iran        | 1                           | 3                        |
| Correia <i>et al</i> [9]      | Portugal    | 1                           | 2                        |
| Disse <i>et al</i> [10]       | Germany     | 2                           | 3                        |
| Dong <i>et al</i> [11]        | China       | 1                           | 4                        |
| Enache <i>et al</i> [12]      | Romania     | 1                           | 3                        |
| Ergon <i>et al</i> [13]       | Turkey      | 1                           | 3                        |
| Facchetti <i>et al</i> [14]   | Italy       | 1                           | 2                        |
| Farhadi <i>et al</i> [15]     | Iran        | 1                           | 4                        |
| Favre <i>et al</i> [16]       | Switzerland | 1                           | 3                        |
| Fitzgerald <i>et al</i> [17]  | Ireland     | 5                           | 3                        |
| Fusco <i>et al</i> [18]       | Brazil      | 3                           | 4                        |
| Gant <i>et al</i> [19]        | USA         | 1                           | 4                        |
| Gioia <i>et al</i> [20]       | Italy       | 1                           | 2                        |
| Karade <i>et al</i> [21]      | India       | 1                           | 3                        |
| Kato <i>et al</i> [22]        | Japan       | 1                           | 3                        |
| Kirtsman <i>et al</i> [23]    | Canada      | 1                           | 3                        |
| Kohorn <i>et al</i> [24]      | USA         | 1                           | 3                        |
| Lesieur <i>et al</i> [25]     | France      | 1                           | 3                        |
| Lorenz N <i>et al</i> [26]    | Germany     | 1                           | 3                        |
| Marinho <i>et al</i> [27]     | Brazil      | 1                           | 4                        |
| Marton <i>et al</i> [28]      | UK          | 1                           | 2                        |
| Marzollo <i>et al</i> [29]    | Italy       | 1                           | 3                        |
| Metodiev <i>et al</i> [30]    | Bulgaria    | 1                           | 3                        |

|                                   |              |   |   |
|-----------------------------------|--------------|---|---|
| NG David <i>et al</i> [31]        | Malaysia     | 1 | 3 |
| Parsa <i>et al</i> [32]           | Iran         | 1 | 4 |
| Patanè <i>et al</i> [33]          | Italy        | 2 | 4 |
| Popescu <i>et al</i> [34]         | Romania      | 1 | 2 |
| Pulinx <i>et al</i> [35]          | Belgium      | 2 | 2 |
| Reagan-Steiner <i>et al</i> [36]  | USA          | 1 | 3 |
| Rebello <i>et al</i> [37]         | Brazil       | 1 | 3 |
| Richtmann <i>et al</i> [38]       | Brazil       | 1 | 4 |
| Rodrigues <i>et al</i> [39]       | Portugal     | 1 | 2 |
| Schueda Stonoga <i>et al</i> [40] | Brazil       | 1 | 2 |
| Sessa <i>et al</i> [41]           | Italy        | 2 | 3 |
| Shaiba <i>et al</i> [42]          | Saudi-Arabia | 1 | 2 |
| Shen <i>et al</i> [43]            | USA          | 1 | 2 |
| Sukhikh <i>et al</i> [44]         | Russia       | 1 | 3 |
| Vivanti <i>et al</i> [45]         | France       | 5 | 2 |
| Vivanti <i>et al</i> [46]         | France       | 1 | 4 |
| Zaigham <i>et al</i> [47]         | Sweden       | 9 | 3 |
| Zamaniyan <i>et al</i> [48]       | Iran         | 1 | 4 |
| Zhang <i>et al</i> [49]           | USA          | 1 | 2 |
| Zinserling <i>et al</i> [50]      | Germany      | 1 | 4 |

**Table S2.** Scoring Criteria for the Murad Tool

|                      |                                                                                                                                                                                                                                                                         |
|----------------------|-------------------------------------------------------------------------------------------------------------------------------------------------------------------------------------------------------------------------------------------------------------------------|
| <b>Selection</b>     | <ul style="list-style-type: none"> <li>• Were the cases presented from a particular study period?</li> </ul>                                                                                                                                                            |
| <b>Ascertainment</b> | <ul style="list-style-type: none"> <li>• Were the cases positive for COVID-19 according to the accepted criteria?</li> <li>• Was the neonates' clinical status reported?</li> </ul>                                                                                     |
| <b>Causality</b>     | <ul style="list-style-type: none"> <li>• Have alternative causes for the presence of symptoms besides COVID-19 infection been ruled out?</li> <li>• Was the duration of the follow-up sufficient for outcomes to occur, such as neonatal discharge or death?</li> </ul> |
| <b>Reporting</b>     | <ul style="list-style-type: none"> <li>• Was the case described sufficiently for other researchers to replicate the study or for practitioners to draw inferences about their own practice?</li> </ul>                                                                  |

**Table S3.** Studies were assessed based on Newcastle-Ottawa Scale. A study with a score of 6 or more is classified as high quality, 4-5 as medium quality, and less than 4 as low quality, using the Newcastle-Ottawa Scale [54].

| <i>Study</i> | <b>Country</b> | <b>Cohort size</b> | <b>Number of cases with confirmed</b> | <b>Quality Assessment Score</b> |
|--------------|----------------|--------------------|---------------------------------------|---------------------------------|
|--------------|----------------|--------------------|---------------------------------------|---------------------------------|

|                               |          |     | vertical<br>transmission |   |
|-------------------------------|----------|-----|--------------------------|---|
| <i>Borges et al</i> [51]      | Portugal | 527 | 1                        | 6 |
| <i>Fenizia et al</i> [52]     | Italy    | 31  | 1                        | 5 |
| <i>Garcia-Ruiz et al</i> [53] | Turkey   | 43  | 1                        | 5 |

**Table S4.** Scoring Criteria for the Newcastle-Ottawa Scale

|                      |                                                                                                                                                                                                                                                                                                                                                    |
|----------------------|----------------------------------------------------------------------------------------------------------------------------------------------------------------------------------------------------------------------------------------------------------------------------------------------------------------------------------------------------|
| <b>Selection</b>     | <ul style="list-style-type: none"> <li>• Were the cases presented representative of the average in the target population?</li> <li>• Were there cases with negative COVID-19 test?</li> <li>• Were the cases taken from medical records?</li> <li>• Was the subject of vertical transmissions followed in the study from the beginning?</li> </ul> |
| <b>Comparability</b> | <ul style="list-style-type: none"> <li>• Were the cases of interest compared to other groups based on the study design or analysis?</li> </ul>                                                                                                                                                                                                     |
| <b>Outcome</b>       | <ul style="list-style-type: none"> <li>• Was there sufficient clinical data on the neonates?</li> <li>• Were the confirmed cases followed up long enough for outcome to occur?</li> <li>• Was there a complete follow-up of the confirmed cases?</li> </ul>                                                                                        |

## Reference

1. Murad, M.H.; Sultan, S.; Haffar, S.; Bazerbachi, F. Methodological quality and synthesis of case series and case reports. *BMJ Evid. Based Med.* **2018**, *23*, 60–63. <https://doi.org/10.1136/bmjebm-2017-110853>.
2. Abadía-Cuchí, N.; Ruiz-Martínez, S.; Fabre, M.; Mateo, P.; Remacha Sienes, M.; Ventura Faci, P.; Bueno Sancho, J. et al. SARS-CoV-2 congenital infection and pre-eclampsia-like syndrome in dichorionic twins: A case report and review of the literature. *Int. J. Gynaecol. Obstet. Off. Organ Int. Fed. Gynaecol. Obstet.* **2021**, *154*(2), 370–372. <https://doi.org/10.1002/ijgo.13749>.
3. Alzamora, M.C.; Paredes, T.; Caceres, D.; Webb, C.M.; Valdez, L.M.; La Rosa, M. Severe COVID-19 during Pregnancy and Possible Vertical Transmission. *Am. J. Perinatol.* **2020**, *37*, 861–865. <https://doi.org/10.1055/s-0040-1710050>.
4. Babal, P.; Krivosikova, L.; Sarvaicova, L.; Deckov, I.; Szemes, T.; Sedlackova, T.; Palkovic, M.; Kalinakova, A.; Janega, P. Intrauterine Fetal Demise After Uncomplicated COVID-19: What Can We Learn from the Case?. *Viruses*. **2021**, *13*(12), 2545. doi: 10.3390/v13122545
5. Boncompagni, A.; De Agostini, M.; Lugli, L.; Ternelli, G.; Colonna, V.; Biagioni, E.; Bonasoni, M.P.; Salviato, T.; Gabrielli, L.; Falconi, M.; et al. Unexpected Vertical Transmission of SARS-CoV-2: Discordant Clinical Course and Transmission from Mother to Newborn. *Microorganisms*. **2022**, *10*, 1718. <https://doi.org/10.3390/microorganisms10091718>
6. Buonsenso, D.; Costa, S.; Sanguinetti, M.; Cattani, P.; Posteraro, B.; Marchetti, S.; Carducci, B.; Lanzone, A.; Tamburrini, E.; Vento, G. Neonatal Late Onset Infection with Severe Acute Respiratory Syndrome Coronavirus 2. *Am. J. Perinatol.* **2020**, *37*(8), 869–872. <https://doi.org/10.1055/s-0040-1710541>.
7. Ferreira, M.D.F.C.; Pavon, J.A.R.; Napoleão, A.C.B.; Figueiredo, G.M.D.P.; Florêncio, P.C.B.; Arantes, R.B.d.S.; Rizzo, P.S.; Carmo, M.A.M.V.; Nakazato, L.; Dutra, V.; et al. Clinical and genomic data of sars-cov-2 detected in maternal–fetal interface during the first wave of infection in Brazil. *Microbes Infect.* **2022**, *24*, 104949. <https://doi.org/10.1016/j.micinf.2022.104949>.

8. Choobdar, F.A.; Ghassemzadeh, M.; Attarian, M.; Abbariki, E.; Nateghian, A.; Ghanbari, B.; Hamzehi, S.S. et al. Transplacental Transmission of SARS-CoV-2 Infection: A Case Report from Iran. *Arch. Pediatr. Infect. Dis.* **2021**, *9*(2), 3572. <https://doi.org/10.5812/pedinfect.108582>
9. Correia, C.R.; Marçal, M.; Vieira, F.; Santos, E.; Novais, C.; Maria, A.T.; Malveiro, D.; Prior, A.R.; Aguiar, M.; Salazar, A.; et al. Congenital SARS-CoV-2 Infection in a Neonate With Severe Acute Respiratory Syndrome. *Pediatr. Infect. Dis. J.* **2020**, *39*, e439–e443. <https://doi.org/10.1097/INF.0000000000002941>
10. Disse, S.C.; Manuylova, T.; Adam, K.; Lechler, A.; Zant, R.; Klingel, K.; Aepinus, C.; Finkenzeller, T.; Wellmann, S.; Schneble, F. COVID-19 in 28-Week Triplets Caused by Intrauterine Transmission of SARS-CoV-2—Case Report. *Front. Pediatr.* **2021**, *9*, 812057. <https://doi.org/10.3389/fped.2021.812057>
11. Dong, L.; Tian, J.; He, S.; Zhu, C.; Wang, J.; Liu, C.; Yang, J. Possible Vertical Transmission of SARS-CoV-2 From an Infected Mother to Her Newborn. *JAMA.* **2020**, *323*(18), 1846–1848. <https://doi.org/10.1001/jama.2020.4621>
12. Enache, A.; Ciocan V.; Muresan C.O.; Cut, T.G.; Novacescu D. et al. Postmortem Documentation of SARS-CoV-2 in Utero and Postpartum Transmission, through Amniotic Fluid, Placental, and Pulmonary Tissue RT-PCR. *Appl. Sci.* **2021**, *11*(20), 9505. doi: 10.3390/app11209505
13. Yangin Ergon E, Akbay S, Aytemiz G, Avcı Çelik EC, Çalışkan Polat A, Umit Z, Paytoncu S., “A novel case of neonatal acute respiratory distress syndrome with SARS-CoV-2 infection: potential perinatal transmission,” *Arch. Argent. Pediatr.*, vol. 119, no. 5, pp. e531–e535, Oct. 2021, doi: 10.5546/aap.2021.eng.e531.
14. Facchetti, F.; Bugatti, M.; Drera, E.; Tripodo, C.; Sartori, E.; Cancila, V.; Papaccio, M.; Castellani, R.; Casola, S.; Boniotti, M.B.; et al. SARS-CoV2 vertical transmission with adverse effects on the newborn revealed through integrated immunohistochemical, electron microscopy and molecular analyses of Placenta. *Ebiomedicine* **2020**, *59*, 102951. <https://doi.org/10.1016/j.ebiom.2020.102951>
15. Farhadi, R.; Mehrpisheh, S.; Ghaffari, V.; Haghsheenas, M.; Ebadi, A. Clinical course, radiological findings and late outcome in preterm infant with suspected vertical transmission born to a mother with severe COVID-19 pneumonia: A case report. *J. Med. Case Rep.* **2021**, *15*, 213. <https://doi.org/10.1186/s13256-021-02835-0>
16. Favre, G.; Mazzetti, S.; Gengler, C.; Bertelli, C.; Schneider, J.; Laubscher, B.; Capoccia, R.; Pakniyat, F.; Ben Jazia, I.; Eggel-Hort, B.; et al. Decreased Fetal Movements: A Sign of Placental SARS-CoV-2 Infection with Perinatal Brain Injury. *Viruses* **2021**, *13*, 2517. <https://doi.org/10.3390/v13122517>
17. Fitzgerald, B.; O'Donoghue, K.; McEntagart, N.; Gillan, J.E.; Kelehan, P.; O'Leary, J.; Downey, P.; Dean, J.; De Gascun, C.F.; Fetal Deaths in Ireland Due to SARS-CoV-2 Placentitis Caused by SARS-CoV-2 Alpha. *Arch. Pathol. Lab. Med.* **2022**, *146*(5), 529–537. doi: 10.5858/arpa.2021-0586-SA.
18. Fusco, M.A.; Mantini, V.; de Souza Salmont Júnior, J.; de Carvalho Gomes, R.G.; de Oliveira Lima, A.R.; de Oliveira Clarim, H.L.; Ferreira, E.C.; de Abreu Almeida, S.S.; Salmont, C.G.; de Sousa Rizzo-Valente, V.; et al. Assessment of SARS-CoV-2 Vertical Transmission through Nested RT-PCR Testing of Neonatal Samples: Three Case Reports. *J. Pediatr. Perinatol. Child Health* **2022**, *6*, 370–376
19. Gant, T. F.; Villegas, T. P.; Summerall-Smith, J.; Watkins, B. Intrauterine fetal demise as a result of maternal COVID-19 infection in the third trimester of pregnancy: A case report. *Int. J. Surg. Case Rep.* **2022**, *98*, 107492, doi: 10.1016/j.ijscr.2022.107492.
20. di Gioia, C.; Zullo, F.; Bruno Vecchio, R.C.; Pajno, C.; Perrone, G.; Galoppi, P.; Pecorini, F.; Di Mascio, D.; Carletti, R.; Prezioso, C. et al. Stillbirth and fetal capillary infection by SARS-CoV-2. *Am. J. Obstet. Gynecol.* **2022**, MFM, *4*(1), 100523. doi: 10.1016/j.ajogmf.2021.100523.
21. Karade, S.; Vishal, A. K.; Sen, S.; Bewal, N.; Gupta, R. M. Probable vertical transmission of severe acute respiratory syndrome coronavirus 2 infection from mother to neonate. *Med. J. Armed Forces India.* **2021**, *77*(2), S490–S493. <https://doi.org/10.1016/j.mjafi.2020.11.026>
22. Kato, M.; Yamaguchi, K.; Maegawa, Y.; Komine-Aizawa, S.; Kondo, E.; Ikeda, T. Intrauterine fetal death during COVID-19 pregnancy: Typical fetal heart rate changes, coagulopathy, and placentitis. *J. Obstet. Gynaecol. Res.* **2022**, vol. 48(7), 1978–1982., doi: 10.1111/jog.15302
23. Kirtsman, M.; Diambomba, Y.; Poutanen, S.M.; Malinowski, A.K.; Vlachodimitropoulou, E.; Parks, W.T.; Erdman, L.; Morris, S.K.; Shah, P.S. Probable congenital SARS-CoV-2 infection in a neonate born to a woman with active SARS-CoV-2 infection. *Can. Med. Assoc. J.* **2020**, *192*, E647–E650. <https://doi.org/10.1503/cmaj.200821>
24. Von Kohorn, I.; Stein, S.R.; Shikani, B.T.; Ramos-Benitez, M.J.; Vannella, K.M.; Hewitt, S.M.; E Kleiner, D.; Alejo, J.C.; Burbelo, P.; I Cohen, J.; et al. In Utero Severe Acute Respiratory Syndrome Coronavirus 2 Infection. *J. Pediatr. Infect. Dis. Soc.* **2020**, *9*, 769–771. <https://doi.org/10.1093/jpids/piaa127>

25. Lesieur, E.; Torrents, J.; Fina, F.; Zandotti, C.; Blanc, J.; Collardeau-Frachon, S.; Gazin, C.; Sirgant, D.; Mezouar, S.; Otmani Idrissi, M.; Lepidi, H. Congenital Infection of Severe Acute Respiratory Syndrome Coronavirus 2 With Intrauterine Fetal Death: A Clinicopathological Study With Molecular Analysis. *Clin. Infect. Dis. Off. Publ. Infect. Dis. Soc. Am.* **2022**, 75(1), e1092–e1100. doi: 10.1093/cid/ciab840
26. Lorenz, N.; Treptow, A.; Schmidt, S.; Hofmann, R.; Raumer-Engler, M.; Heubner, G.; Gröber, K. Neonatal Early-Onset Infection With SARS-CoV-2 in a Newborn Presenting With Encephalitic Symptoms. *Pediatr. Infect. Dis. J.* **2020**, 39, e212. <https://doi.org/10.1097/INF.0000000000002735>
27. Marinho, P.S.; da Cunha, A.J.L.A.; Chimelli, L.; Avvad-Portari, E.; Andreiuolo, F.D.M.; de Oliveira-Szejnfeld, P.S.; Mendes, M.A.; et al. Case Report: SARS-CoV-2 Mother-to-Child Transmission and Fetal Death Associated With Severe Placental Thromboembolism. *Front. Med.* **2021**, 8, 677001. doi: 10.3389/fmed.2021.677001.
28. Marton, T.; Hargitai, B.; Hunter, K.; Pugh, M.; Murray, P. Massive Perivillous Fibrin Deposition and Chronic Histocytic Intervillitis a Complication of SARS-CoV-2 Infection. *Pediatr. Dev. Pathol.* **2021** 24(5), 450–454, doi: 10.1177/10935266211020723.
29. Marzollo, R.; Aversa, S.; Prefumo, F.; Saccani, B.; Perez, C.R.; Sartori, E.; Motta, M. Possible Coronavirus Disease 2019 Pandemic and Pregnancy: Vertical Transmission Is Not Excluded. *Pediatr. Infect. Dis. J.* **2020**, 39, e261–e262. <https://doi.org/10.1097/INF.0000000000002816>.
30. Metodiev, D.; Ruseva, M.; Parvanov, D.; Ganeva, R.; Handzhiyska, M.; Vidolova, N.; Stamenov, G. Vertical Transmission of SARS-CoV-2 Infection and Miscarriage in the Second Trimester: Report of an Immunohistochemically Proven Case. *Clin. Pract.* **2022**, 12 (4), 579–590, <https://doi.org/10.3390/clinpract12040061>.
31. Ng, D.C.; Chin, L.; Choo, P.P.L.; Paramasivam, U. COVID-19 in a premature infant. *BMJ Case Rep.* **2021**, 14, e243783. <https://doi.org/10.1136/bcr-2021-243783>.
32. Parsa, Y.; Shokri, N.; Jahedbozorgan, T.; Naeiji, Z.; Zadehmodares, S.; Moridi, A. Possible Vertical Transmission of COVID-19 to the Newborn; a Case Report. *Arch. Acad. Emerg. Med.* **2021**, 9(1):e5. <https://doi.org/10.22037/aaem.v9i1.923>.
33. Patanè, L.; Cadamuro, M.; Massazza, G.; Pirola, S.; Stagnati, V.; Comerio, C.; Carnelli, M.; Arosio, M.; Callegaro, A.P.; Tebaldi, P.; et al. Evidence of vertical transmission of SARS-CoV-2 and interstitial pneumonia in second-trimester twin stillbirth in asymptomatic woman. Case report and review of the literature. *Am. J. Obstet. Gynecol. MFM.* **2022**, 4(3), 100589, doi: 10.1016/j.ajogmf.2022.100589.
34. Popescu, D.E.; Cioca, A.; Muresan, C.; Navolan, D.; Gui, A.; Pop, O.; Marcovici, T.; Ilie, C.; Craina, M.; Boia, M. A. A Case of COVID-19 Pregnancy Complicated with Hydrops Fetalis and Intrauterine Death. *Med. Kaunas Lith.* **2021**, 57(7), 667 doi: 10.3390/medicina57070667.
35. Pulinx, B.; Kieffer, D.; Michiels, I.; Petermans, S.; Strybol, D.; Delvaux, S.; Baldewijns, M.; Raymaekers, M.; Cartuyvels, R.; Maurissen, W. Vertical transmission of SARS-CoV-2 infection and preterm birth. *Eur. J. Clin. Microbiol. Infect. Dis.* **2020**, 39, 2441–2445. <https://doi.org/10.1007/s10096-020-03964-y>.
36. Reagan-Steiner, S.; Bhatnagar, J.; Martinez, R.B.; Milligan, N.S.; Gisondo, C.; Williams, F.B.; Lee, E.; Estetter, L.; Bullock, H.; Goldsmith, C.S.; et al. Detection of SARS-CoV-2 in Neonatal Autopsy Tissues and Placenta. *Emerg. Infect. Dis.* **2022**, 28, 510–517. <https://doi.org/10.3201/eid2803.211735>
37. Rebello, C.M.; Fascina, L.P.; Annicchino, G.; Pinho, J.R.R.; Yoshida, R.D.A.M.; Zacharias, R.S.B. Vertical transmission of SARS-CoV-2 from infected pregnant mother to the neonate detected by cord blood real-time polymerase chain reaction (RT-PCR). *Pediatr. Res.* **2020**, 89, 1592–1593. <https://doi.org/10.1038/s41390-020-01193-9>.
38. Richtmann, R.; Torloni, M.R.; Oyamada Otani, A.R.; Levi, J.E.; Crema Tobará, M.; de Almeida Silva, C.; Dias, L.; Miglioli-Galvão, L.; Martins Silva, P.; Macoto Kondo, M.; Fetal deaths in pregnancies with SARS-CoV-2 infection in Brazil: A case series. *Case Rep. Womens Health.* **2020**, 27, e00243. doi: 10.1016/j.crwh.2020.e00243.
39. Rodrigues, M. L.; Gasparinho, G.; Sepúlveda, F.; Matos, T. Signs suggestive of congenital SARS-CoV-2 infection with in-trauterine fetal death: A case report. *Eur. J. Obstet. Gynecol. Reprod. Biol.* **2021**, 256, 508–509. doi: 10.1016/j.ejogrb.2020.11.042.
40. Stonoga, E.T.S.; Lanzoni, L.D.A.; Rebutini, P.Z.; de Oliveira, A.L.P.; Chiste, J.A.; Fugaça, C.A.; Prá, D.M.M.; Percicote, A.P.; Rossoni, A.; Nogueira, M.B.; et al. Intrauterine Transmission of SARS-CoV-2. *Emerg. Infect. Dis.* **2021**, 27, 638–641. <https://doi.org/10.3201/eid2702.203824>.
41. Sessa, R.; Masciullo, L.; Filardo, S.; Di Pietro, M.; Brandolino, G.; Brunelli, R.; Galoppi, P.; Terrin, G.; Viscardi, M.F.; Anastasi, E.; et al. SARS-CoV-2 vertical transmission in a twin-pregnant woman: A case report. *Int. J. Infect. Dis.* **2022**, 125, 192–194. <https://doi.org/10.1016/j.ijid.2022.10.019>.

42. Shaiba, L.A.; Hadid, A.; Altirkawi, K.A.; Bakheet, H.M.; Alherz, A.M.; Hussain, S.A.; Sobaih, B.H.; Alnemri, A.M.; Almaghrabi, R.; Ahmed, M.; et al. Case Report: Neonatal Multi-System Inflammatory Syndrome Associated With SARS-CoV-2 Exposure in Two Cases From Saudi Arabia. *Front. Pediatr.* **2021**, *9*, 652857. <https://doi.org/10.3389/fped.2021.652857>.
43. Shen, W.-B.; Turan, S.; Wang, B.; Cojocaru, L.; Harman, C.; Logue, J.; Reece, E.A.; Frieman, M.B.; Yang, P. A SARS-CoV-2 Delta Variant Case Manifesting as Extensive Placental Infection and Fetal Transmission. *Gynecol. Obstet. Investig.* **2022**, *87*, 165–172. <https://doi.org/10.1159/000524905>.
44. Sukhikh, G.; Petrova, U.; Prikhodko, A.; Starodubtseva, N.; Chingin, K.; Chen, H.; Bugrova, A.; Kononikhin, A.; Bourmenskaya, O.; Brzhozovskiy, A.; et al. Vertical Transmission of SARS-CoV-2 in Second Trimester Associated with Severe Neonatal Pathology. *Viruses* **2021**, *13*, 447. <https://doi.org/10.3390/v13030447>.
45. Vivanti, A.J.; Vauloup-Fellous, C.; Escourrou, G.; Rosenblatt, J.; Jouannic, J.-M.; Laurent-Bellue, A.; De Luca, D. Factors associated with SARS-CoV-2 transplacental transmission. *Am. J. Obstet. Gynecol.* **2022**, *227*, 541–543.e11. <https://doi.org/10.1016/j.ajog.2022.05.015>.
46. Vivanti, A.J.; Vauloup-Fellous, C.; Prevot, S.; Zupan, V.; Suffee, C.; Do Cao, J.; Benachi, A.; De Luca, D. Transplacental transmission of SARS-CoV-2 infection. *Nat. Commun.* **2020**, *11*, 3572. <https://doi.org/10.1038/s41467-020-17436-6>.
47. Zaigham, M.; Gisselsson, D.; Sand, A.; Wikström, A.; von Wowern, E.; Schwartz, D.A.; Iorizzo, L.; Nelander, M.; Blomberg, M.; Papadogiannakis, N.; et al. Clinical-pathological features in placentas of pregnancies with SARS-CoV-2 infection and adverse outcome: Case series with and without congenital transmission. *BJOG: Int. J. Obstet. Gynaecol.* **2022**, *129*, 1361–1374. <https://doi.org/10.1111/1471-0528.17132>.
48. Zamaniyan, M.; Ebadi, A.; Aghajanpoor, S.; Rahmani, Z.; Haghshenas, M.; Azizi, S. Preterm delivery, maternal death, and vertical transmission in a pregnant woman with COVID-19 infection. *Prenat. Diagn.* **2020**, *40*, 1759–1761. <https://doi.org/10.1002/pd.5713>.
49. Zhang, P.; Salafia, C.; Heyman, T.; Salafia, C.; Lederman, S.; Dygulska, B. Detection of severe acute respiratory syndrome coronavirus 2 in placentas with pathology and vertical transmission. *Am. J. Obstet. Gynecol. MFM.* **2020**, *2*(4), 100197. <https://doi.org/10.1016/j.ajogmf.2020.100197>.
50. Zinserling, V.A.; Bornstein, S.R.; Narkevich, T.A.; Sukhanova, Y.V.; Semenova, N.Y.; Vashukova, M.A.; Steenblock, C. Stillborn child with diffuse SARS-CoV-2 viral infection of multiple organs. *Idcases* **2021**, *26*, e01328. <https://doi.org/10.1016/j.idcr.2021.e01328>.
51. Borges Charepe, N.; Queirós, A.; Alves, M.J.; Serrano, F.; Ferreira, C.; Gamito, M.; Smet, C.; Silva, V.; Féria, B.; Laranjo, M.; Martins, I. One Year of COVID-19 in Pregnancy: A National Wide Collaborative Study. *Acta Med. Port.* **2022**, *35*(5), 357–366. doi: 10.20344/amp.16574.
52. Fenizia, C.; Biasin, M.; Cetin, I.; Vergani, P.; Mileto, D.; Spinillo, A.; Gismondo, M.R.; Perotti, F.; Callegari, C.; Mancon, A.; et al. Analysis of SARS-CoV-2 vertical transmission during pregnancy. *Nat. Commun.* **2020**, *11*, 5128. <https://doi.org/10.1038/s41467-020-18933-4>.
53. Garcia-Ruiz, I.; Sulleiro, E.; Serrano, B.; Fernandez-Buhigas, I.; Rodriguez-Gomez, L.; Fernandez, D.S.-N.; Anton-Pagarolas, A.; Esperalba-Esquerre, J.; Frick, M.A.; Camba, F.; et al. Congenital infection of SARS-CoV-2 in live-born neonates: A population-based descriptive study. *Clin. Microbiol. Infect.* **2021**, *27*, 1521.e1–1521.e5. <https://doi.org/10.1016/j.cmi.2021.06.016>.
